# Supplementary material for: Automated Nuclear Cartography Reveals Conserved Sperm Chromosome Territory Localization across 2 Million Years of Mouse Evolution
Source: MDPI journal article supplement (doi:10.3390/genes10020109), 2019-02-01
Supplement: s1 [file s1]

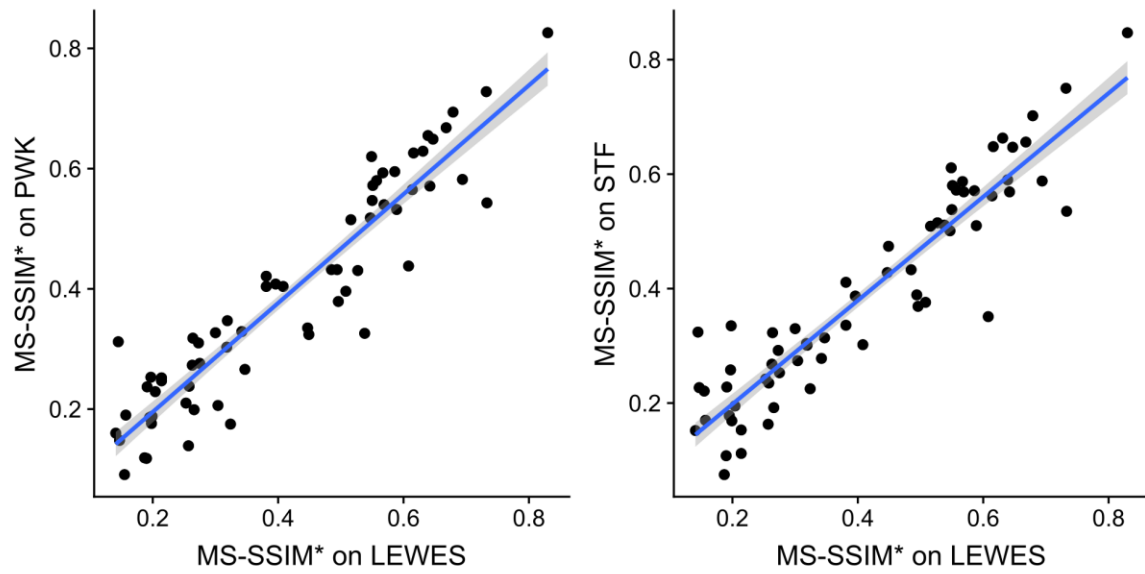

**Figure 1.** Chromosomes X and 19 co-hybridization.

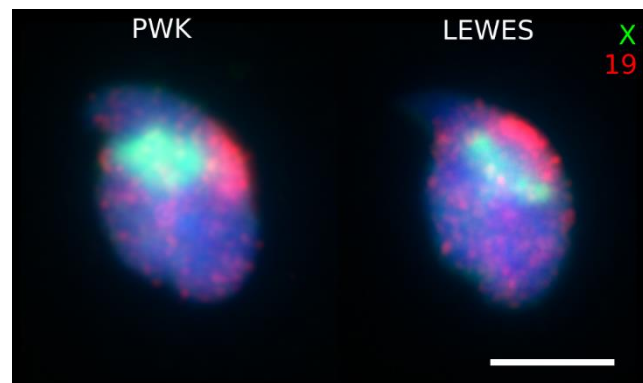

**Figure 2.** Comparison of MS-SSIM \* scores using different warping templates.

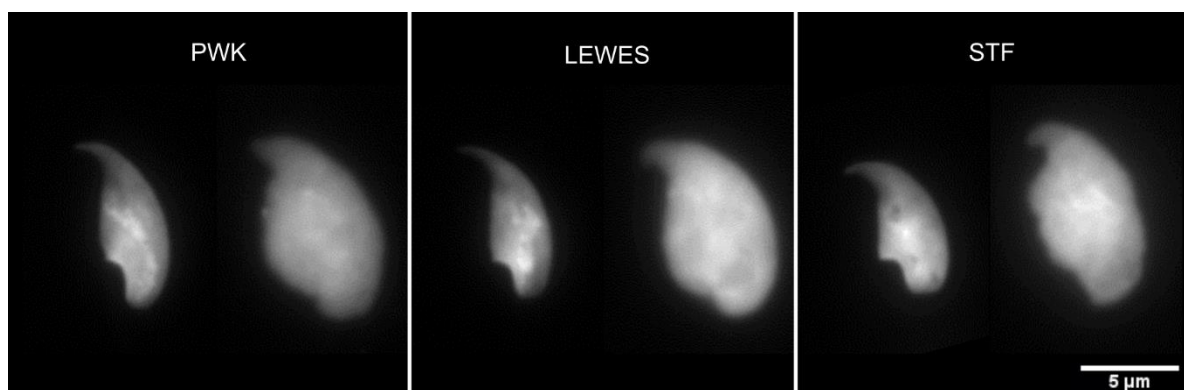

**Figure 3.** Examples of swelled and unswelled nuclei.
